# Supplementary material
Source: publisher site journal article supplement (https://www.kjim.org/upload/media/kjim-2023-523-Supplementary-Fig-1.pdf)
Supplement: Supplementary file 1 [file kjim-2023-523-Supplementary-Fig-1.pdf]

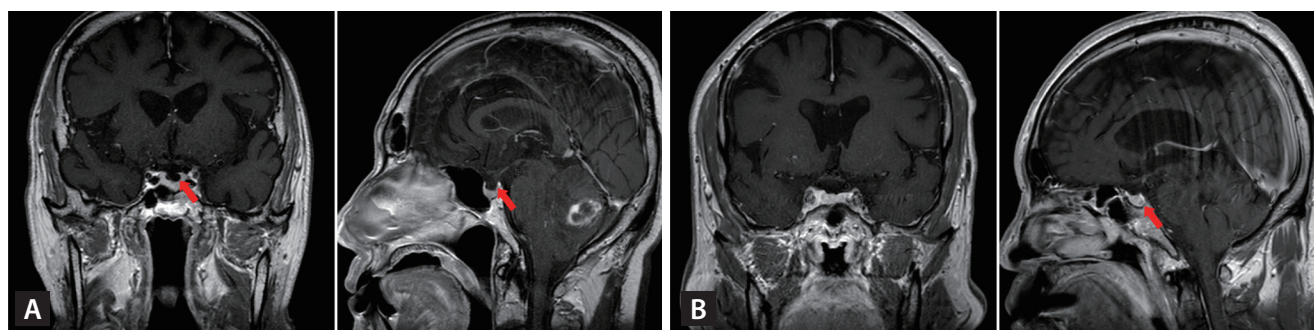

**Supplementary Figure 1.** Magnetic resonance imaging findings in two cases of patients (patient 1 [A] and 8 [B]) with immune-related hypophysitis. The red arrow indicates abnormal pituitary gland findings.
